# Supplementary material for: A CRISPR/Cas12a-based fluorescence method for the amplified detection of total antioxidant capacity
Source: Royal Society of Chemistry journal article supplement (doi:10.1039/d4ay01150c), 2024-01-01
Supplement: d4ay01150c1.pdf [file d4ay01150c1.pdf]

1

## Electronic Supplementary Material

2

# 3 **A CRISPR/Cas12a-based Fluorescent Method for the** 4 **Amplified Detection of Total Antioxidant Capacity**

5 *Qi Wu †, Longyingzi Xie †, Lanrui Ma †, Xinqi Long †, Lei Liu †, Aihua Chen †, Yongliang Cui †, Yaohai*

6

*Zhang †, Yue He \*†*

7

† Key Laboratory of Quality and Safety Control of Citrus Fruits, Ministry of Agriculture and Rural

8

Affairs, Southwest University, Chongqing, 400712, P.R. China; National Citrus Engineering Research

9

Center, Citrus Research Institute, Southwest University, Chongqing, 400712, P.R. China

10

11 \* To whom correspondence should be addressed. Tel: 86-23-68349603, Fax: 86-23-

12 68349046, Dr. Yue He, E-mail: [yuehe@cric.cn](mailto:yuehe@cric.cn)

14 **This file contains:**

15 1. Supporting figures 1-6 with legends

16 2. Supporting tables 1-3

17

18 1. Supporting figures 1-5 with legends

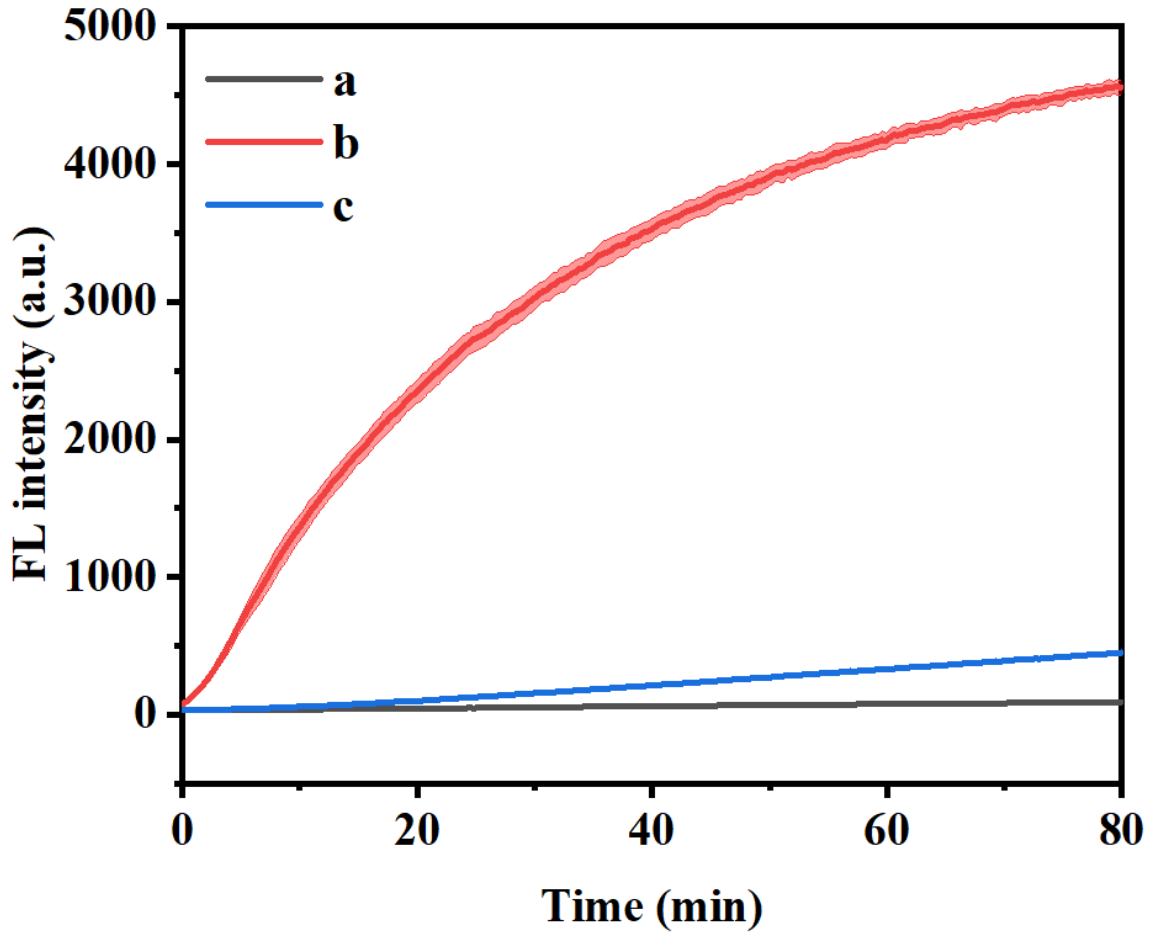

19

20 **Fig. S1** Time-dependent *trans*-cleavage signals of Cas12a under different treatments: (a)

21 CRISPR/Cas12a system; (b) CRISPR/Cas12a system +  $Mn^{2+}$ ; (c) CRISPR/Cas12a

22 system + ( $Mn^{2+}$  + EDTA). The CRISPR/Cas12a system contain Cas12a-crRNA complex

23 (25 nM), substrate ssDNA (20 nM), and ssDNA-FQ (500 nM).  $Mn^{2+}$ , 30  $\mu M$ ; EDTA, 30

24

$\mu M$

25

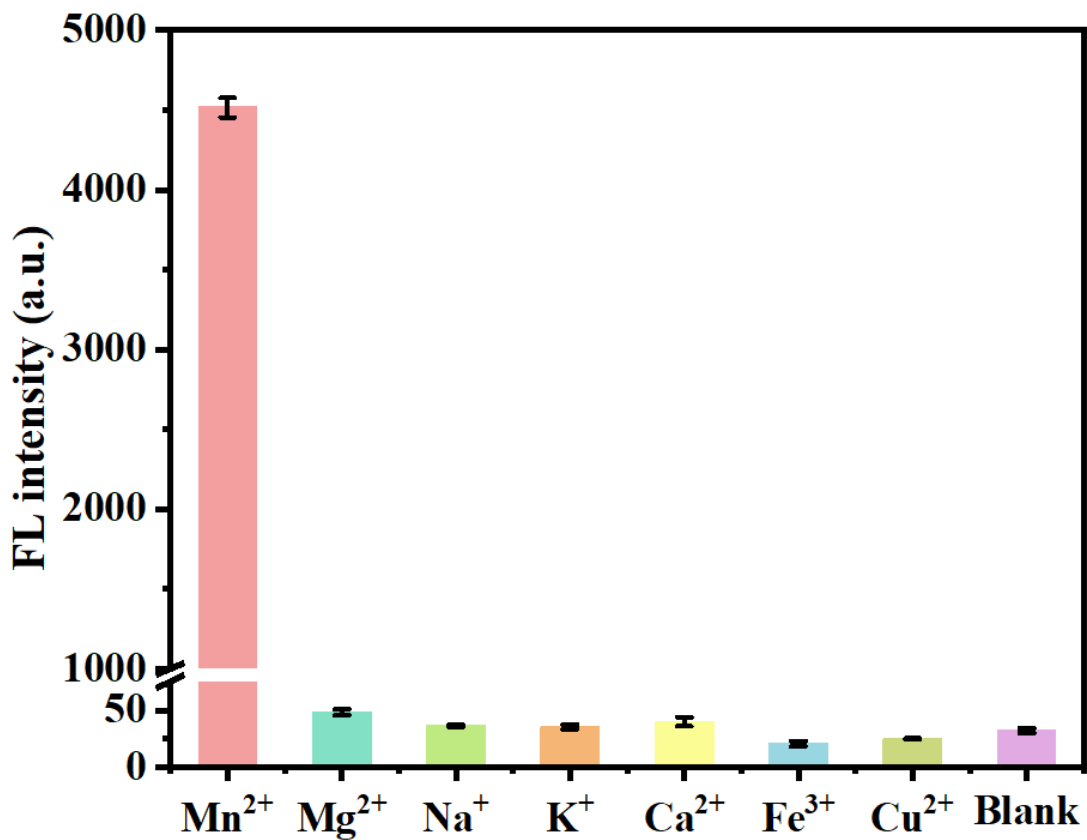

26

27 **Fig. S2** Assess the effect of metal ions on the *trans*-cleavage activity of Cas12a. The  
 28 concentrations of Mn<sup>2+</sup> and Mg<sup>2+</sup> were 30 μM. And the concentrations of other metal ions  
 29 were 60 μM. Cas12a-crRNA complex, 25 nM; ssDNA-FQ, 500 nM; substrate ssDNA, 20  
 30 nM. The error bars were calculated using the standard deviation (SD) of three repeated

31

experiments

32

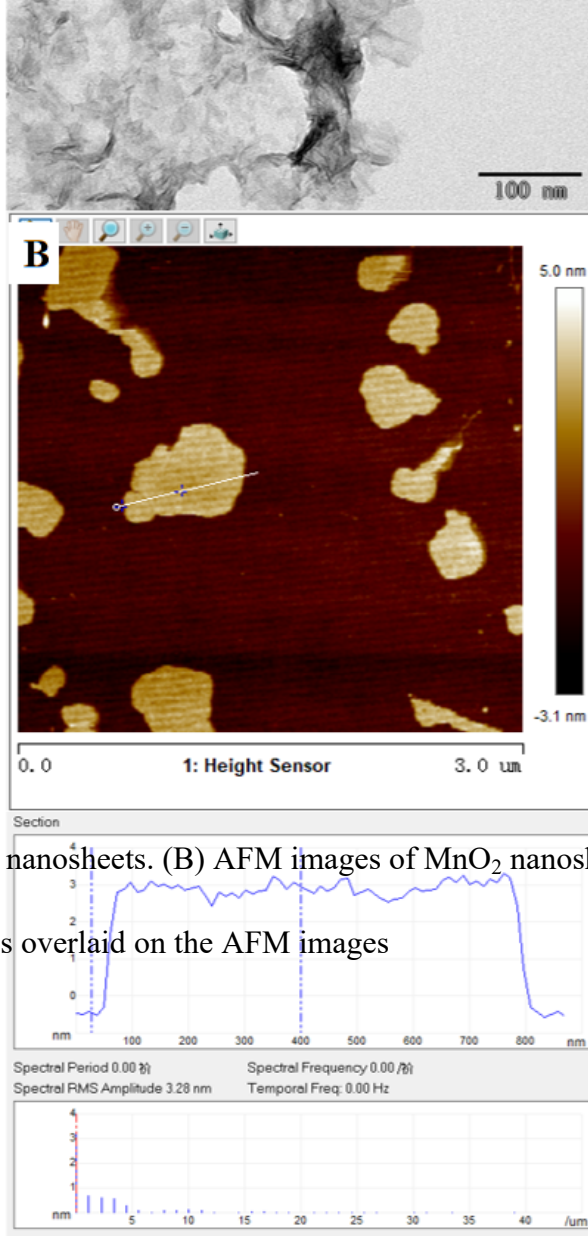

33

34 **Fig. S3** (A) TEM images of MnO<sub>2</sub> nanosheets. (B) AFM images of MnO<sub>2</sub> nanosheets and

35 height profiles along the white lines overlaid on the AFM images

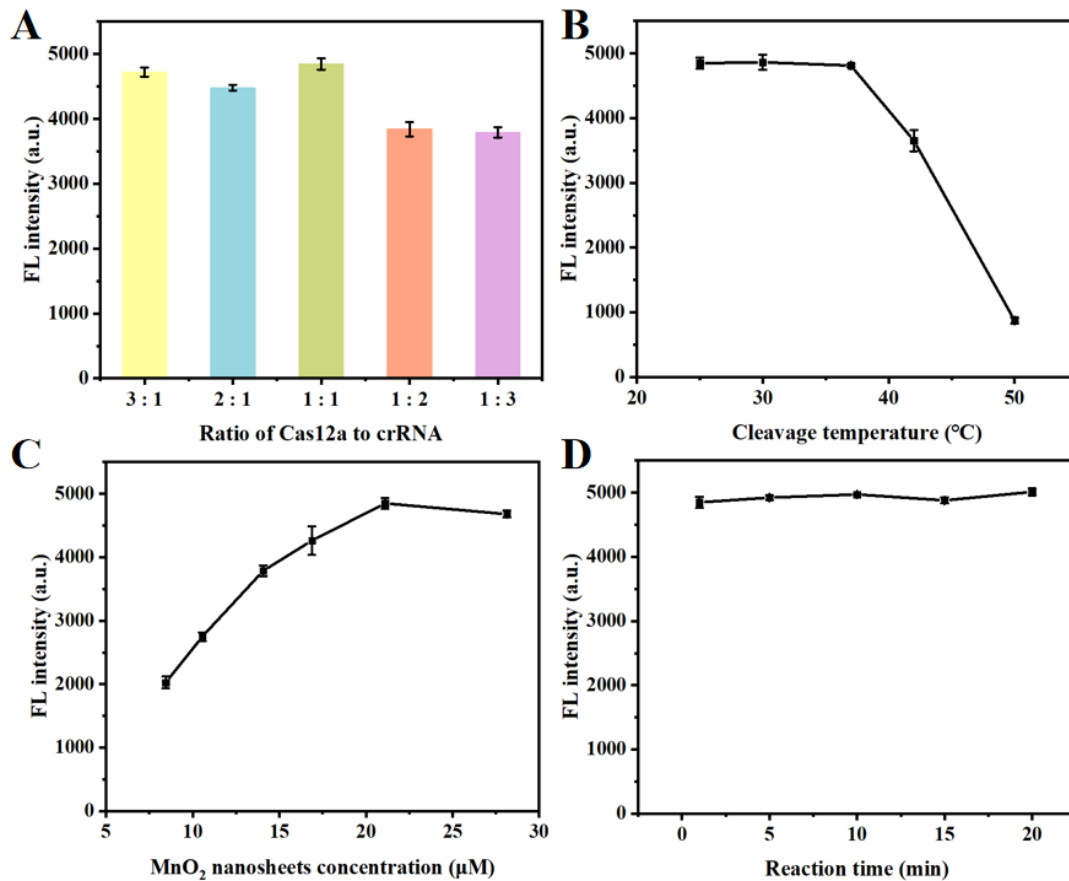

36

37 **Fig. S4** Conditions optimization of the proposed FL method. (A) The molar ratio of  
 38 Cas12a to crRNA. (B) The cleavage temperatures for Cas12a. (C) The concentration of  
 39 MnO<sub>2</sub> nanosheets. (D) The reaction time between AA and MnO<sub>2</sub> nanosheets. Cas12a-  
 40 crRNA complex, 25 nM; ssDNA-FQ, 500 nM; substrate ssDNA, 20 nM; AA, 25 μM;  
 41 MnO<sub>2</sub> nanosheets, 21.1 μM. The error bars were calculated using the SD of three

42

repeated experiments

43

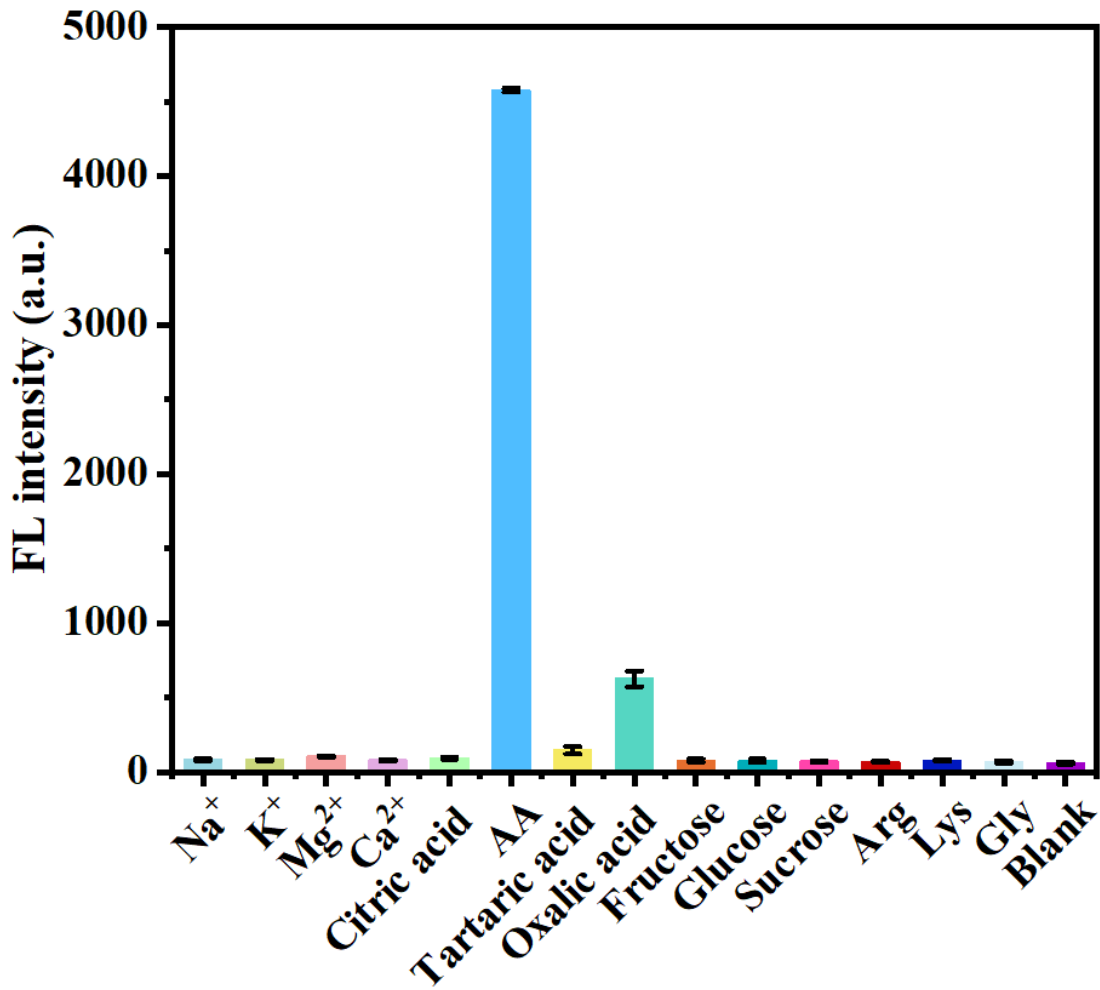

44

45 **Fig. S5** The FL response intensities of the proposed FL method to Na<sup>+</sup>, K<sup>+</sup>, Mg<sup>2+</sup>, Ca<sup>2+</sup>,  
 46 citric acid, tartaric acid, oxalic acid, fructose, glucose, sucrose, Arg, Lys, Gly and AA at a  
 47 concentration of 20 mg·L<sup>-1</sup>. The error bars were calculated using the SD of three repeated  
 48 experiments

49

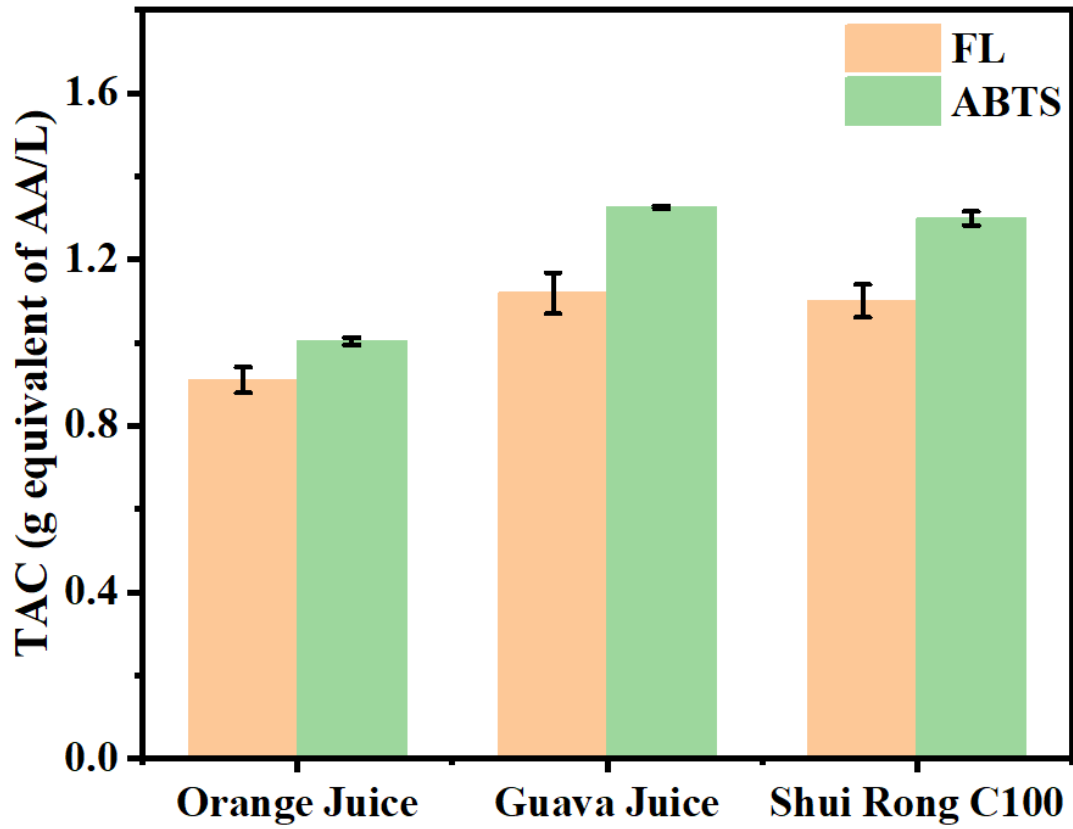

50

51 **Fig. S6** Determined TAC values in the three beverage samples and comparison with

52

standard ABTS assay

53



55 **2. Supporting tables 1-3**

56 **Table S1** Oligonucleotide sequences used in this work

| <b>Oligonucleotide</b> | <b>Sequence (5'→3')</b>                  |
|------------------------|------------------------------------------|
| crRNA                  | UAAUUUCUACUAAGUGUAGAUUCCUAGUGGGGGCGAACCC |
| substrate ssDNA        | GGGTTCGCCCACTAGGA                        |
| ssDNA-FQ               | FAM-TTATT-BHQ1                           |

57

58 **Table S2** The FL intensity of three repeated experiments and the corresponding relative  
 59 standard deviation (RSD) values of the sensing solution for different concentrations of AA

| <b>Concentration<br/>(mg·L<sup>-1</sup>)</b> | <b>Data</b> |       |       | <b>Average<br/>value</b> | <b>RSD/%</b> |
|----------------------------------------------|-------------|-------|-------|--------------------------|--------------|
| 20                                           | 4595        | 4466  | 4646  | 4569.00                  | 2.03         |
| 15                                           | 4358        | 4181  | 4501  | 4346.67                  | 3.69         |
| 12.5                                         | 4146        | 4156  | 4051  | 4117.67                  | 1.41         |
| 10                                           | 3149        | 3206  | 3123  | 3159.33                  | 1.34         |
| 7.5                                          | 2416        | 2382  | 2579  | 2459.00                  | 4.28         |
| 5                                            | 1365        | 1107  | 1120  | 1197.33                  | 12.14        |
| 2.5                                          | 375.2       | 483.5 | 398.5 | 419.07                   | 13.60        |
| 1                                            | 175.4       | 157.4 | 136.8 | 156.53                   | 12.34        |
| 0.5                                          | 72.97       | 97.02 | 78.41 | 82.80                    | 15.23        |
| 0.1                                          | 54.17       | 63.25 | 54.58 | 57.33                    | 8.94         |
| 0                                            | 52.02       | 60.54 | 58.57 | 57.04                    | 7.82         |
| <b>Average value</b>                         |             |       |       |                          | 7.53         |

60

61 **Table S3** Comparison the analytical performance of different fluorescent methods for AA

62 detection

| <b>Materials</b>                                       | <b>Linear Range<br/>(<math>\mu\text{M}</math>)</b> | <b>Detection Limit<br/>(<math>\mu\text{M}</math>)</b> | <b>Reference</b> |
|--------------------------------------------------------|----------------------------------------------------|-------------------------------------------------------|------------------|
| BSA-AuNCs                                              | 3-50                                               | 0.4                                                   | 1                |
| $\text{CrO}_4^{2-}$ @Cd-MOFs                           | 46.3-591                                           | 41.28                                                 | 2                |
| GQDs-hypochlorite                                      | 8-60                                               | 1.4                                                   | 3                |
| RhB@MOF nanocomposite                                  | 1-25                                               | 0.31                                                  | 4                |
| CuInZnS QDs@FeOOH                                      | 5-60                                               | 1.5                                                   | 5                |
| DBHM + $\text{Cu}^{2+}$ sensor                         | 0-500                                              | 2.37                                                  | 6                |
| Cu NPs/N-Ti <sub>3</sub> C <sub>2</sub> T <sub>x</sub> | 5-150                                              | 0.437                                                 | 7                |
| NiNCs/ $\text{Fe}^{3+}$ composites                     | 20-200                                             | 7.45                                                  | 8                |
| CA-CDs                                                 | 5-100                                              | 0.15                                                  | 9                |
| $\text{Fe}_3\text{O}_4$ @SiO <sub>2</sub> @UiO-PBA     | 5-60                                               | 2.5                                                   | 10               |
| CRISPR/Cas12a-MnO <sub>2</sub>                         | 2.84-70.97                                         | 0.23                                                  | This work        |

63

## 64 **References:**

- 65 1. P. Ni, S. Liu, B. Wang, C. Chen, Y. Jiang, C. Zhang, J. Chen and Y. Lu, *Journal of Hazardous*  
66 *Materials*, 2021, **411**.
- 67 2. J. N. Xiao, J. J. Liu, M. Y. Liu, G. F. Ji and Z. L. Liu, *Inorganic Chemistry*, 2019, **58**, 6167-6174.
- 68 3. M. Wang, J. Chen, C. Liu, J. Qiu, X. Wang, P. Chen and C. Xu, *Small*, 2017, **13**.
- 69 4. L. Guo, Y. Liu, R. Kong, G. Chen, Z. Liu, F. Qu, L. Xia and W. Tan, *Analytical Chemistry*, 2019, **91**,  
70 12453-12460.
- 71 5. Y. B. Liu, G. Y. Sun, P. Y. Ma and D. Q. Song, *Talanta*, 2024, **271**.
- 72 6. Q. Meng, J. X. Yao, M. Y. Chen, Y. J. Dong, X. Y. Liu, S. Y. Zhao, R. Qiao, C. B. Bai, C. Q. Qu and  
73 H. Miao, *Analytica Chimica Acta*, 2023, **1276**.
- 74 7. J. Huang, C. Shen, H. Gu, G. Wang, P. Zhou, X. Liu, K. Yu, Y. Qin, K. Zhou, J. Zhang and Z. Chen,  
75 *ACS Sustainable Chemistry & Engineering*, 2023, **11**, 17472-17481.
- 76 8. J. Li, N. Yao, X. Zhang and Y. Liu, *Dyes and Pigments*, 2024, **221**.
- 77 9. Z. Lin, Q. Zeng, W. Yao, W. Chen, C. Cai, J. Yang, X. Lin and W. Chen, *Food Chemistry*, 2024, **437**.
- 78 10. T. Wan, Z. Zhang, H. Wang, Y. Yang, H. Wang, J. Zhang, Y. Zeng and L. Li, *Spectrochimica Acta*  
79 *Part A: Molecular and Biomolecular Spectroscopy*, 2024, **305**.
- 80
